# Supplementary material
Source: PubMed Central journal article supplement (PMC4385482)
Supplement: NIHMS658453-supplement-01.pdf [file NIHMS658453-supplement-01.pdf]

Supplementary Table 1. Comparison of sperm aneuploidy in men with normal and abnormal sperm DNA Fragmentation

|                                 | <b>Fragmentation &gt;30%</b> | <b>Fragmentation &lt;=30%</b> | <b>p</b> |
|---------------------------------|------------------------------|-------------------------------|----------|
| <b>Age</b>                      | 37.8 +/- 7.9                 | 37.6 +/- 5.2                  | 0.931    |
| <b>SM%</b>                      | 1.50 +/- 1.53                | 2.24 +/- 1.87                 | 0.211    |
| <b>Density</b>                  | 13.4 +/- 17.6                | 41.4 +/- 36.6                 | <0.001   |
| <b>Motility</b>                 | 25.9% +/- 19.3               | 49.4% +/- 17.5                | <0.001   |
| <b>Sex Disomy %</b>             | 0.01% +/- 0.01               | 0.07% +/- 0.66                | 0.713    |
| <b>18 Disomy %</b>              | 0.12% +/- 0.16               | 0.16% +/- 0.41                | 0.741    |
| <b>Diploid Sperm</b>            | 0.71% +/- 1.73               | 0.18% +/- 0.33                | 0.263    |
| <b>Sex Chromosome Disomy</b>    | 60.0% (n=9)                  | 49.5% (n=55)                  | 0.584    |
| <b>Chromosome 18 Disomy</b>     | 46.7% (n=7)                  | 32.4% (n=36)                  | 0.384    |
| <b>Chromosomes 13/21 Disomy</b> | 46.7% (n=7)                  | 46.8% (n=52)                  | 1.000    |
